# Supplementary material for: Efficient microbial production of stylopine using a Pichia pastoris expression system
Source: PubMed Central journal article supplement (PMC4770593; doi:10.1038/srep22201), 2016-02-29
Supplement: srep22201-s1.pdf [file srep22201-s1.pdf]

## Supplementary information

### Efficient microbial production of stylophine using a *Pichia pastoris* expression system

Kentaro Hori, Shunsuke Okano, Fumihiko Sato\*,<sup>1</sup>

<sup>1</sup>Division of Integrated Life Science, Graduate School of Biostudies, Kyoto University,  
Kitashirakawa, Sakyo, Kyoto 606-8502, Japan

\*fsato@lif.kyoto-u.ac.jp

### Supplementary Table S1. Sequences of primers used in colony PCR

Straight and dotted lines indicate *Spe* I and *Eco*R I restriction sites, respectively.

| primer name                                         | Oligonucleotide sequence (5' to 3')      |
|-----------------------------------------------------|------------------------------------------|
| Primers for pPIC3.5K construct                      |                                          |
| Biosynthetic gene-specific primers                  |                                          |
| codon-optimized <i>Ec</i> BBE pPIC3.5K forward      | <u>ACTAGT</u> ATGGAAAACAAAACCTCCCATCTTC  |
| codon-optimized <i>Ec</i> CYP719A5 pPIC3.5K forward | <u>ACTAGT</u> ATGGAGGAGTCATTGTGGG        |
| codon-optimized <i>Ec</i> CYP719A2 pPIC3.5K forward | <u>ACTAGT</u> ATGGAGGAAATGAAAATCTTG      |
| pPIC3.5K vector-specific primer                     |                                          |
| 3'AOX reverse                                       | GCAAATGGCATTCTGACATCC                    |
| Primers for pAO815 construct                        |                                          |
| Biosynthetic gene-specific primers                  |                                          |
| codon-optimized <i>Ec</i> BBE pAO815 forward        | <u>GAATTC</u> ATGGAAAACAAAACCTCCCATC     |
| codon-optimized <i>Ec</i> BBE pAO815 reverse        | <u>GAATTC</u> CTATATTACAACCTTCTCCACCATC  |
| codon-optimized <i>Ec</i> CYP719A5 pAO815 forward   | <u>GAATTC</u> ATGGAGGAGTCATTGTGGG        |
| codon-optimized <i>Ec</i> CYP719A5 pAO815 reverse   | <u>GAATTC</u> TTACAATTGGGTTCTAGGAGTGAT   |
| codon-optimized <i>Ec</i> CYP719A2 pAO815 forward   | ATCG <u>GAATTC</u> ATGGAGGAAATGAAAATCTTG |
| codon-optimized <i>Ec</i> CYP719A2 pAO815 reverse   | <u>GAATTC</u> TTAGTTTCTTCTATTAATTCTAGC   |

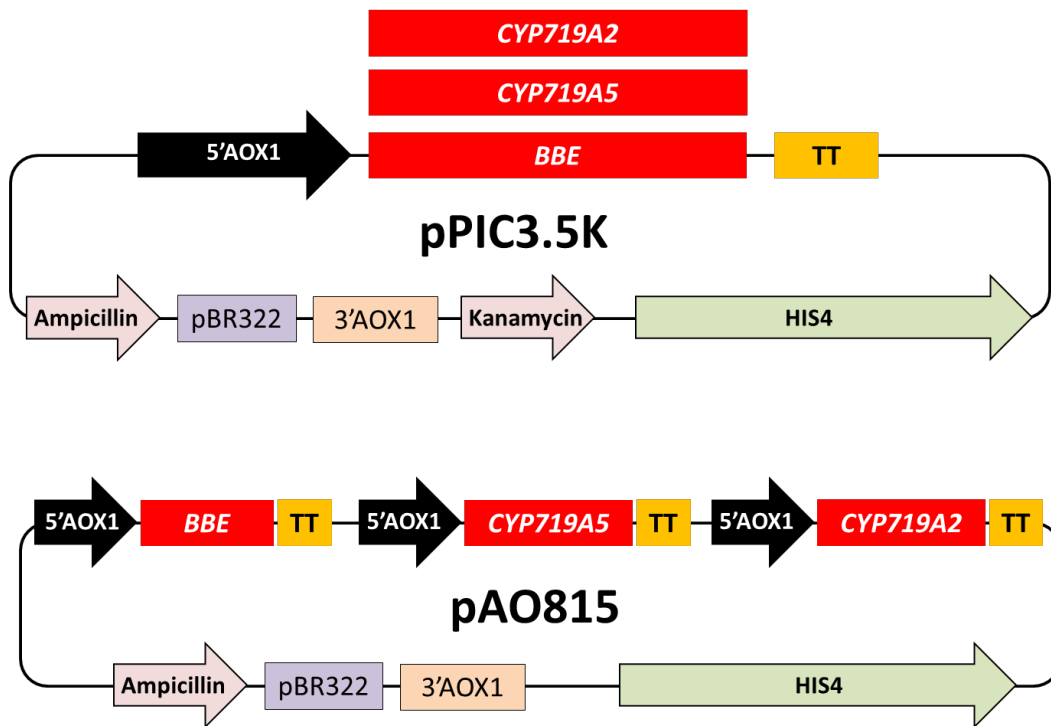

**Supplementary Figure S1. Map of vectors for single gene expression (pPIC3.5K) and the co-expression of multiple genes (pAO815).**

5'AOX1 = the *AOX1* promoter

TT = Native transcription termination and polyadenylation signal from *AOX1* gene

Ampicillin = Ampicillin resistance gene

pBR322 = *E. coli* origin of replication

3'AOX1 = Sequences from the *AOX1* gene

Kanamycin = Kanamycin resistance gene

HIS4 = *Pichia* wild-type gene coding for histidinol dehydrogenase

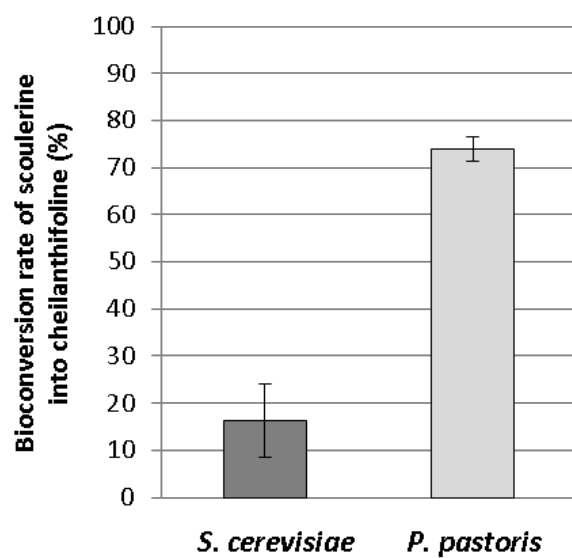

**Supplementary Figure S2. Comparison of bioconversion activity in *Saccharomyces cerevisiae* and *Pichia pastoris*.**

The rate of the bioconversion of 200  $\mu$ M scoulerine into cheilanthifoline by *S. cerevisiae* and *P. pastoris* cells expressing CYP719A5. Error bars indicate the standard deviation calculated from three independent experiments.

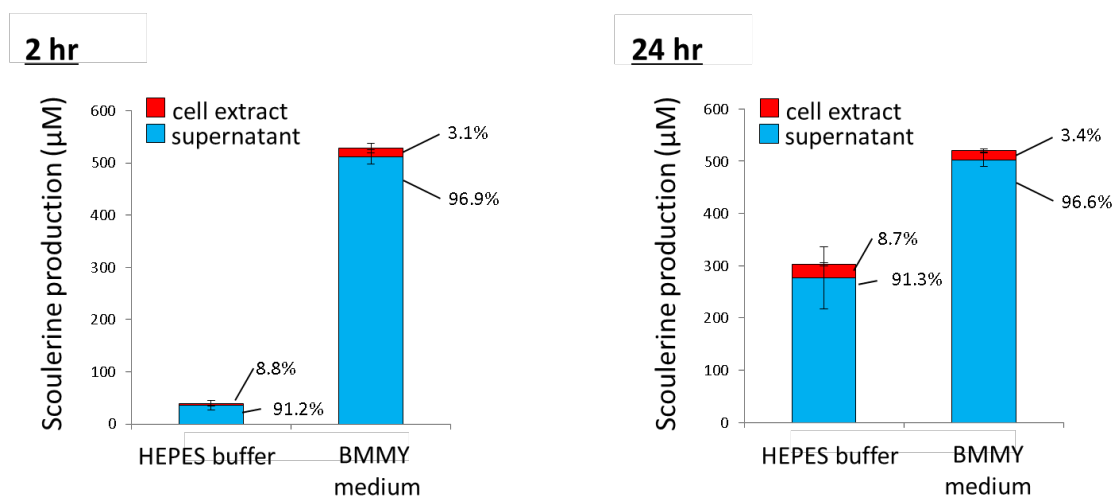

**Supplementary Figure S3. Comparison of the effect of the reaction conditions on bioconversion activity; HEPES buffer vs BMMY medium.**

The amount of scoulerine produced from 1 mM (*R, S*)-reticuline after 2 or 24 hr of incubation with *Pichia* cells expressing BBE in HEPES buffer or BMMY medium. Error bars indicate the standard deviation calculated from three independent experiments.

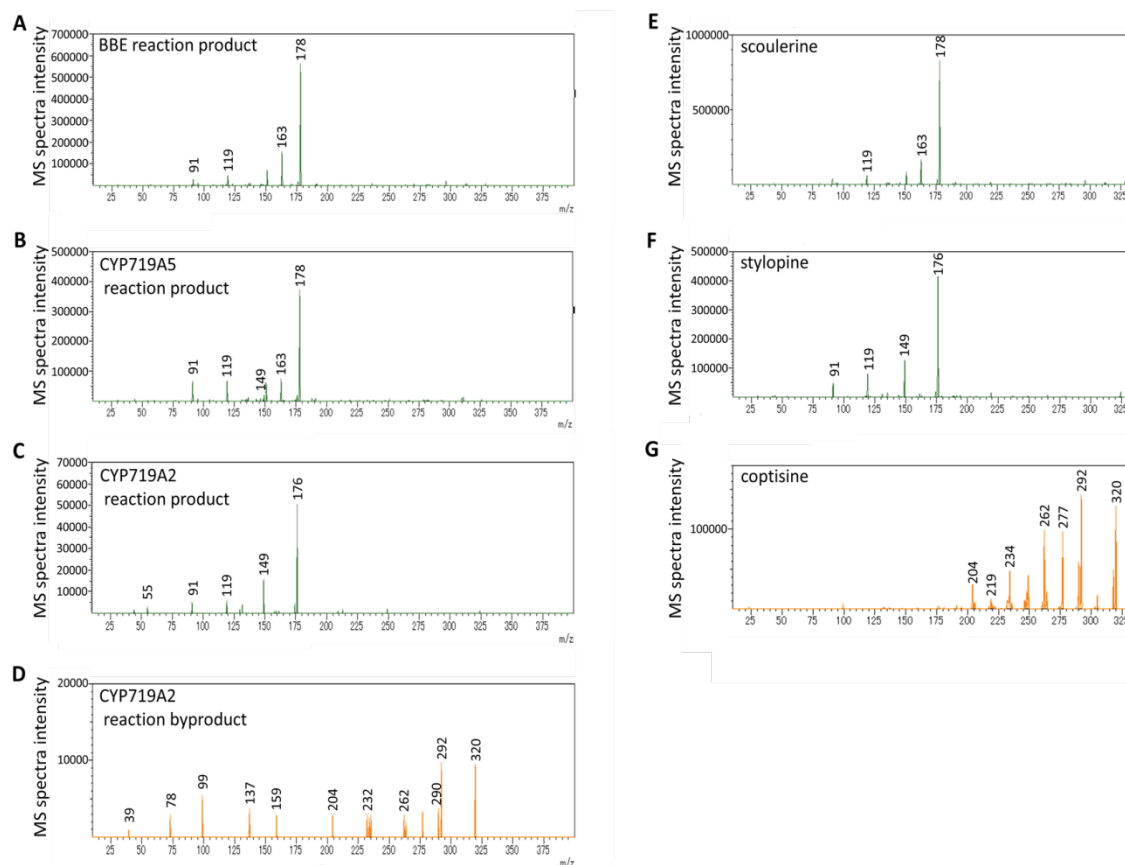

**Supplementary Figure S4. MS fragments spectra of *in vivo* reaction products of BBE, CYP719A5, and CYP719A2 and authentic samples.**

(A), BBE reaction product (precursor ion: m/z 328); (B), CYP719A5 reaction product (precursor ion: m/z 326); (C), CYP719A2 reaction product (precursor ion: m/z 324); (D), CYP719A2 reaction by-product (precursor ion: m/z 320); (E), authentic scoulerine (precursor ion: m/z 328,  $[M+H]^+$ ); (F), authentic stylophine (precursor ion: m/z 324,  $[M+H]^+$ ); (G), authentic coptisine (precursor ion: m/z 320,  $[M]^+$ ).

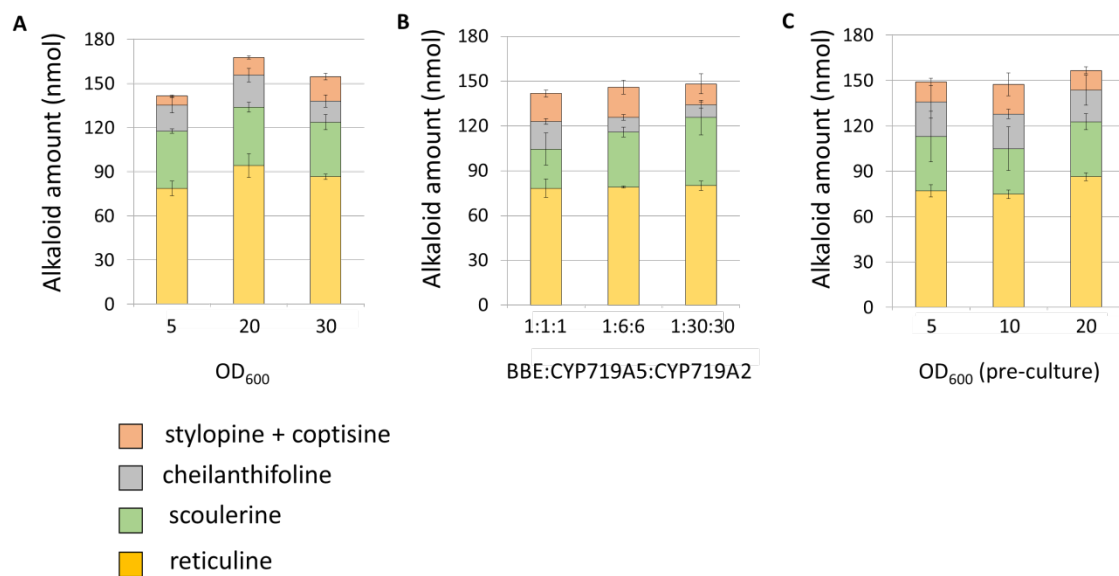

**Supplementary Figure S5. Effects of different cell densities (A), ratios of transformants (B), or preculture conditions (C) on the bioconversion of reticuline in co-culture system**

Bioconversion activities were determined as a whole reaction in a co-culture system after 24 hr of incubation; (A) Cell densities were modified from OD<sub>600</sub> of 5 to 30 in the bioconversion reaction, after cells were pre-cultured until OD<sub>600</sub> = 30. Three transformants (BBE:CYP719A5:CYP719A2) were mixed at 1:1:1. (B) Three transformants were mixed with different ratios (BBE:CYP719A5:CYP719A2 = 1:1:1, 1:6:6 and 1:30:30) at total OD<sub>600</sub> = 30, after cells were grown until OD<sub>600</sub> = 30. (C) After transformants were pre-cultured until OD<sub>600</sub> = 5, 10 and 20, bioconversion activity of cells were measured at the cell density of OD<sub>600</sub> = 30 with the ratio of 1:1:1 of the three transformants. The alkaloid amounts were determined by HPLC analysis at 280 nm. Error bars indicate the standard deviation calculated from three independent experiments.
